# Supplementary material for: MicroRNA-mRNA Co-sequencing Identifies Transcriptional and Post-transcriptional Regulatory Networks Underlying Muscle Wasting in Cancer Cachexia
Source: Front Genet. 2020 May 29;11:541. doi: 10.3389/fgene.2020.00541 (PMC7272700; doi:10.3389/fgene.2020.00541)
Supplement: TABLE S3 — Functional classification of differentially expressed genes in Tibialis Anterior muscle in LLC tumor-bearing mice. [file Table_2.XLSX]

## Sheet: Gene Ontology
Module	GO	Term	% Associated Genes	Nr. Genes	Associated Genes Found Cancer
Cellular Scaffold	GO:0030016	Myofibril	57.73	31	[Actc1, Actn1, Actn2, Ankrd1, Ankrd2, Csrp3, Fbxl22, Fbxo32, Itgb1bp2, Kcnj8, Kcnn2, Ldb2, Lmod2, Lmod3, Mmp2, Myh1, Myh2, Myh7, Myl1, Myl2, Myl3, Myo18b, Myom3, Myoz2, Palld, Pde4b, Pdlim3, Synpo2, Timp4, Tjp1, Trim63]
Cellular Scaffold	GO:0030574	Collagen catabolic process	32	8	[Adam15, Ctsk, Fap, Mmp13, Mmp2, Mmp8, Mmp9, Mrc2]
Cellular Scaffold	GO:0031012	Extracellular matrix	24.2788	101	[Abi3bp, Ache, Adamts12, Adamts15, Adamts4, Adamts5, Adamts9, Adamtsl5, Alpl, Aspn, Bgn, Bmp1, Ccdc80, Cilp, Clec3b, Col12a1, Col14a1, Col15a1, Col16a1, Col1a1, Col1a2, Col22a1, Col3a1, Col4a3, Col5a1, Col5a2, Col5a3, Col6a1, Col6a2, Col6a3, Col9a1, Crispld2, Ctgf, Cyr61, Dcn, Dpt, Ecm1, Ecm2, Efemp1, Emid1, Entpd1, Entpd2, F3, Fbln7, Fbn1, Fmod, Fn1, Gpc3, Hmcn1, Hmcn2, Hspg2, Htra1, Igf1, Igfbp…
Cellular Scaffold	GO:0005921	Gap junction	15.625	5	[Dbn1, Nov, Panx1, Tjp1, Ybx3]
Cellular Scaffold	GO:0005923	Bicellular tight junction	10.1	11	[Adcyap1r1, Ccnd1, Cldn1, Cldn15, Cldn5, Clmp, Jam3, Plxdc1, Pmp22, Tgfbr1, Tjp1]
Mebatolism	GO:0006003	Fructose 2,6-bisphosphate metabolic process	50	3	[Gck, Pfkfb1, Pfkfb3]
Mebatolism	GO:0045821	Positive regulation of glycolytic process	23.0769	4	[Gck, Gpd1, Igf1, Myc]
Signaling	GO:0005520	Insulin-like growth factor binding	29.1667	7	[Ctgf, Cyr61, Htra1, Htra3, Igfbp6, Igfbp7, Nov]
Signaling	GO:1900745	Positive regulation of p38MAPK cascade	26.6667	4	[Gadd45a, Gadd45b, Gadd45g, Vegfa]
Signaling	GO:0004016	Adenylate cyclase activity	18.1818	4	[Adcy1, Adcy4, Adcy6, Adcy7]
Signaling	GO:0071560	Cellular response to transforming growth factor beta	10.5528	22	[Ankrd1, Aspn, Cldn5, Clec3b, Col1a1, Col1a2, Col3a1, Dbn1, Fbn1, Fn1, Htra1, Htra3, Lrg1, Ltbp4, Nepn, Nrep, Pmepa1, Postn, Runx1, Tgfbr1, Wnt4, Wnt5a]
Signaling	GO:0046330	Positive regulation of JNK cascade	9.48276	11	[Ankrd6, Ccl21a, Ctgf, Eda2r, Epha4, Gadd45a, Gadd45b, Gadd45g, Il1b, Map4k2, Wnt5a]
Differentiation	GO:0045666	Regulation of neuron differentiation	28.32	29	[Akap5, Ankrd1, Avil, Bcl2, Bmp5, Caprin2, Cdon, Cux2, Cxcl12, Epha4, Fbxo31, Fn1, Foxo6, Gdf5, Heyl, Impact, Lpar1, Marcks, Mmd, Nbl1, Ntrk2, Plxnb3, Scarf2, Sema7a, Serpinf1, Tgif1, Timp2, Vegfa, Wnt5a]
Differentiation	GO:0005161	platelet-derived growth factor receptor binding	27.2727	5	[Pdgfra, Pdgfrb, Pik3r1,Vegfa, Vegfd]
Differentiation	GO:0035914	Skeletal muscle cell differentiation	25.91	15	[Ankrd1, Ankrd2, Cdon, Cyp26b1, Egr1, Heyl, Maff, Myc, Myf6, Myog, Nr4a1, Pax7, Rb1, Rbfox1, Sap30]
Differentiation	GO:0007409	Axonogenesis	25.25	34	[Adcy1, Bcl2, Boc, Cxcl12, Ecm2, Epha4, Fmod, Fn1, Lrp4, Lrtm2, Lum, Matn2, Meg3, Myh10, Ndn, Nr4a3, Ntng2, Ntrk2, Ogn, Plxnb3, Plxnd1, Prelp, Rab3a, Sema3f, Sema3g, Sema6b, Sema6c, Sema7a, Sparcl1, Spp1, Thy1, Unc5b, Vegfa, Wnt5a]
Differentiation	GO:0001525	Angiogenesis	13.3028	57	[Adam15, Anxa3, Apold1, Arhgap24, Btg1, Ccl11, Col4a3, Cspg4, Ctgf, Cxcl12, Cxcr2, Cyr61, Dcn, Ecm1, Ecscr, F3, Fap, Figf, Fn1, Gna13, Hmox1, Hspg2, Il1b, Jam3, Kdr, Lrg1, Meg3, Mmp2, Ncl, Ngp, Notch3, Nov, Nr4a1, Pdgfra, Pdgfrb, Pgf, Plau, Plcd3, Plxdc1, Plxnd1, Ppp1r15a, Rgcc, Rora, Runx1, S1pr1, Serpinf1, Sox17, Srpx2, Tgfbr1, Thbs2, Thbs4, Thy1, Tmem100, Tnfaip2, Tspan12, Unc5b, Vegfa, Wnt5a]
Differentiation	GO:0030335	Positive regulation of cell migration	12.3116	48	[Anxa3, Atoh8, Bcl2, Ccl11, Ccl21a, Cd274, Cmklr1, Col1a1, Coro1a, Cxcl12, Cxcl14, Cxcl9, Cxcr2, Cyr61, Ddr2, Fbxo31, Figf, Fn1, Igf1, Il1b, Kdr, Lamb1, Lgals3, Lpar1, Mmp9, Myoc, Pdgfra, Pdgfrb, Pik3cd, Pik3r1, Plau, Plvap, Postn, Ptp4a1, Ptprc, Rac2, S1pr1, Selp, Sema3f, Sema3g, Sema6b, Sema6c, Sema7a, Srpx2, Tgfbr1, Thbs4, Vegfa, Vtn, Wnt5a]
Differentiation	GO:0042060	Wound healing	11.811	45	[Adam15, Arhgap24, Axl, Col1a1, Col3a1, Col5a1, Cpq, Cyr61, Dcn, Eno3, Entpd1, Entpd2, F3, Fn1, Gna13, Gsn, Hmox1, Igf1, Il1b, Lox, Myf6, Myh10, Myh2, Myog, Nfe2l2, Nov, P2ry1, Pax7, Pdgfra, Pdgfrb, Pik3cd, Plau, Postn, Prkg1, Rpl3, S100a8, S100a9, Scara5, Sdc2, Selp, Stab2, Tnc, Wfdc1, Wnt4, Wnt5a]
Immune system	GO:0071354	Cellular response to interleukin-6	21.4286	6	[Entpd2, Il6ra, Sbno2, Selp, Selplg, Stat3]
Immune system	GO:0030593	Neutrophil chemotaxis	16.4706	14	[Ccl11, Ccl21a, Csf3r, Cxcr2, Il1b, Itgam, Jam3, Lgals3, Pde4b, Rac2, S100a8, S100a9, Spp1, Thbs4]
Immune system	GO:0030595	Leukocyte chemotaxis	14.8571	25	[Ccl11, Ccl21a, Cmklr1, Coro1a, Csf3r, Cxcl12, Cxcl14, Cxcl9, Cxcr2, Figf, Il1b, Itgam, Jam3, Lgals3, Nbl1, Nov, Pde4b, Rac2, Retnlg, S100a8, S100a9, Sbds, Spp1, Thbs4, Vegfa, Wnt5a]
Immune system	GO:0071356	Cellular response to tumor necrosis factor	14.1892	21	[Adamts12, Ankrd1, Ccl11, Ccl21a, Col1a1, Daxx, Entpd2, Erbb2ip, Foxo3, Gpd1, Klf2, Lcn2, Nfe2l2, Ntrk2, Plvap, Postn, Relt, Rora, Tnfrsf10b, Tnfrsf1b, Ybx3]
Immune system	GO:0071346	Cellular response to interferon-gamma	9.85915	7	[Aqp4, Ccl11, Ccl21a, Gbp3, Hsp90ab1, Mrc1, Wnt5a]
Respiration	GO:0005344	Oxygen transporter activity	19.99	3	[Hbb-bs, Hbb-bt, Mb]
Respiration	GO:0006749	Glutathione metabolic process	14.2857	9	[Gclm, Gdap1, Ggt6, Gpx3, Gsr, Gstm2, Gstt1, Gstt2, Nfe2l2]
Respiration	GO:0051901	Regulation of mitochondrial depolarization	10.4	4	[Dcn, Kdr, Mgea5, Myoc]
Respiration	GO:0046902	Mitochondrial membrane permeability	8.33333	4	[Bcl2, Bnip3, Ppif, Stat3]
Proteolysis	GO:0000502	Proteasome complex	15.7895	12	[Adrm1, Dnajb2, Psma5, Psma7, Psmc2, Psmc4, Psmd11, Psmd2, Psmd3, Psmd4, Psmd7, Psmd8]
Proteolysis	GO:0016239	Positive regulation of macroautophagy	12.766	6	[Bnip3, Dcn, Hmox1, Kdr, Rab12, Sqstm1]
Proteolysis	GO:0005776	Autophagosome	12.6582	10	[Gabarapl1, Il1b, Map1lc3b, Peg3, Rab12, Sqstm1, Tbc1d17, Trp53inp1, Trp53inp2, Zfyve1]
Ion regulation	GO:0071277	Cellular response to calcium ion	13.4615	8	[Adcy1, Cpne2, Dpep1,Itpkb, Junb, Ppif, Rasgrp2, Wnt5a]
Ion regulation	GO:0006813	Potassium ion transport	7.69231	16	[Abcc8, Actn2, Akap5, Atp1b1, Atp1b4, Fhl1, Gck, Kcna7, Kcnc1, Kcnf1, Kcng4, Kcnh2, Kcnj8, Kcnk5, Kcnn2, Slc12a2]
